# Supplementary material for: Metabolomics Analysis of Laparoscopic Surgery Combined with Wuda Granule to Promote Rapid Recovery of Patients with Colorectal Cancer Using UPLC/Q‐TOF‐MS/MS
Source: Hindawi journal article supplement (doi:10.1155/2020/5068268), 2020-01-01
Supplement: f1 [file 5068268.f1.pdf]

## Supplementary Materials

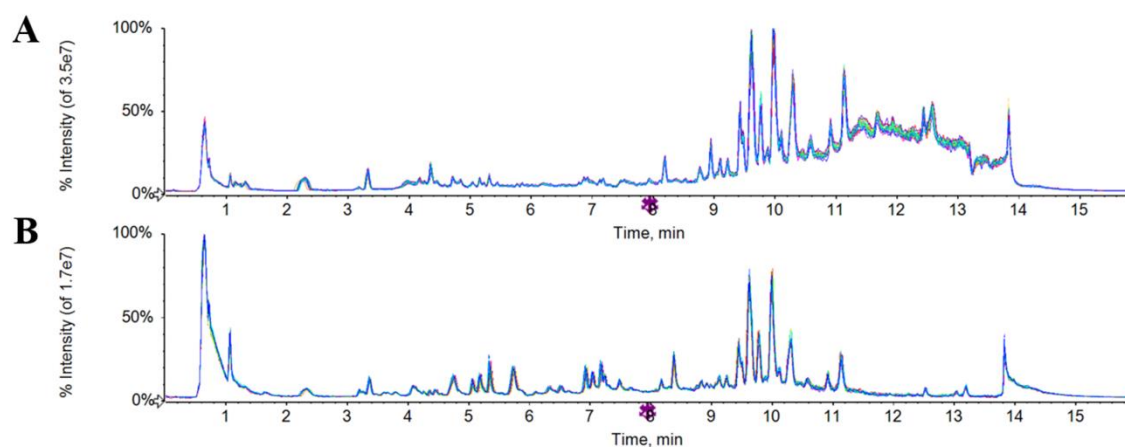

Figure S1: The TICs of the superposition of the QC samples in the positive and negative ion mode. A, in positive ion modes; B, in negative ion modes.

Table S1: The detailed information for the 11 reference substances used in this study.

| Name                     | CAS No.    | Lot No.      | Manufacturer                                  |
|--------------------------|------------|--------------|-----------------------------------------------|
| Leucine                  | 61-90-5    | S10D9I76995  | Shanghai yuanye Bio-Technology Co., Ltd       |
| Glutamine                | 56-85-9    | 011M01991V   | Shanghai yuanye Bio-Technology Co., Ltd       |
| Tryptophan               | 73-22-3    | S02D7I26049  | Shanghai yuanye Bio-Technology Co., Ltd       |
| Hisdine                  | 71-00-1    | Z19A9H59384  | Shanghai yuanye Bio-Technology Co., Ltd       |
| Palmitic acid            | 57-10-3    | M20N6K6269   | Shanghai yuanye Bio-Technology Co., Ltd       |
| Pyruvic acid             | 127-17-3   | H08S6Q3079   | Shanghai yuanye Bio-Technology Co., Ltd       |
| LysoPC (16:0)            | 17364-16-8 | B1911189     | Shanghai Aladdin Bio-Chem Technology Co., LTD |
| LysoPC (18:0)            | 19420-57-6 | I1730026     | Shanghai Aladdin Bio-Chem Technology Co., LTD |
| $\alpha$ -Linolenic acid | 463-40-1   | Q29J10Q79787 | Shanghai yuanye Bio-Technology Co., Ltd       |
| Arachidonic acid         | 506-32-1   | Q18J10Q91289 | Shanghai yuanye Bio-Technology Co., Ltd       |
| Serotonin                | 50-67-9    | BCCB5452     | Sigma-aldrich                                 |

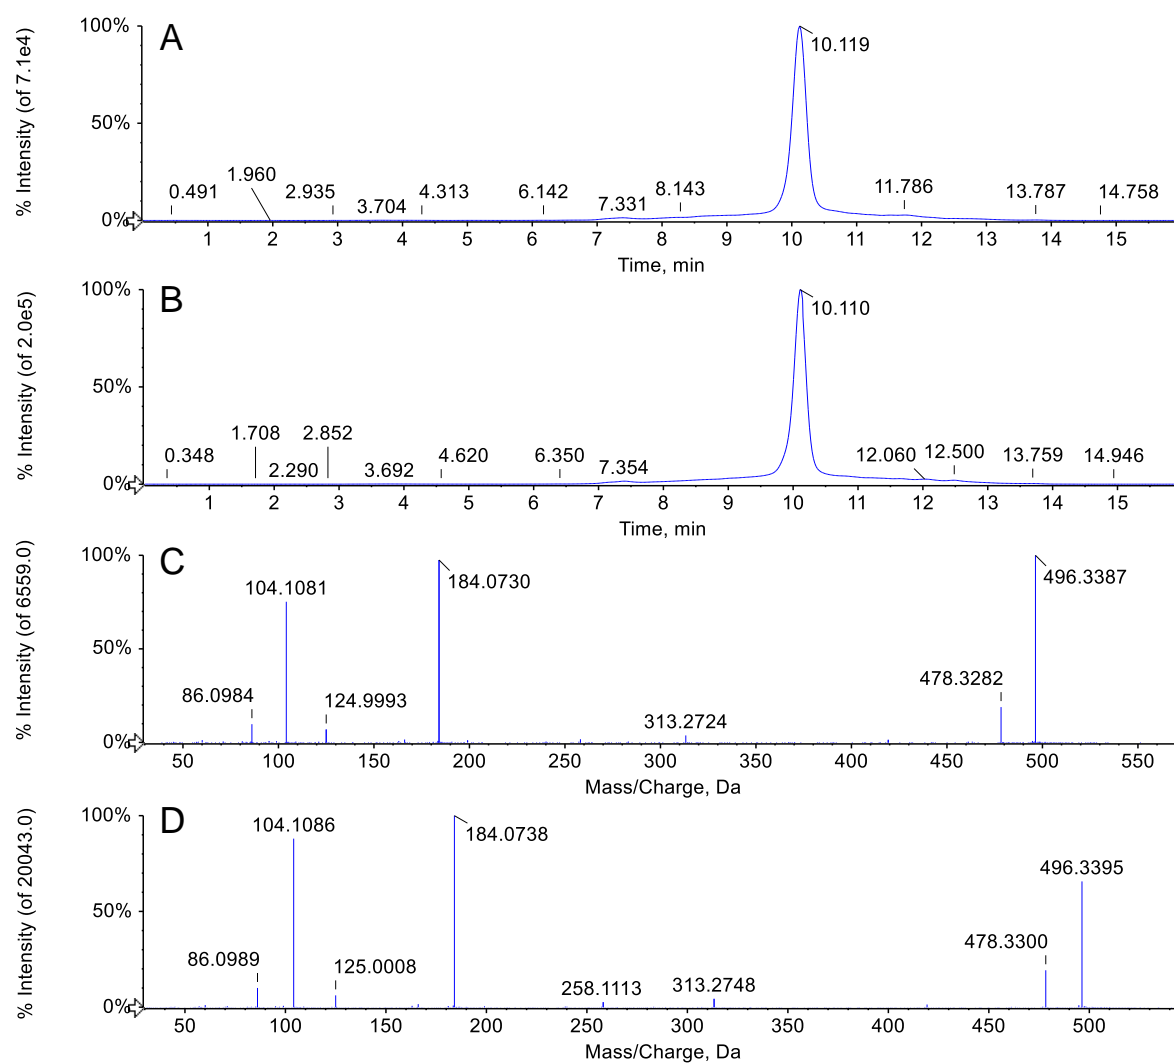

Fig S2: The EIC and MS/MS spectra for **LysoPC (16:0)** from the reference substance (A and C) and serum sample (B and D)

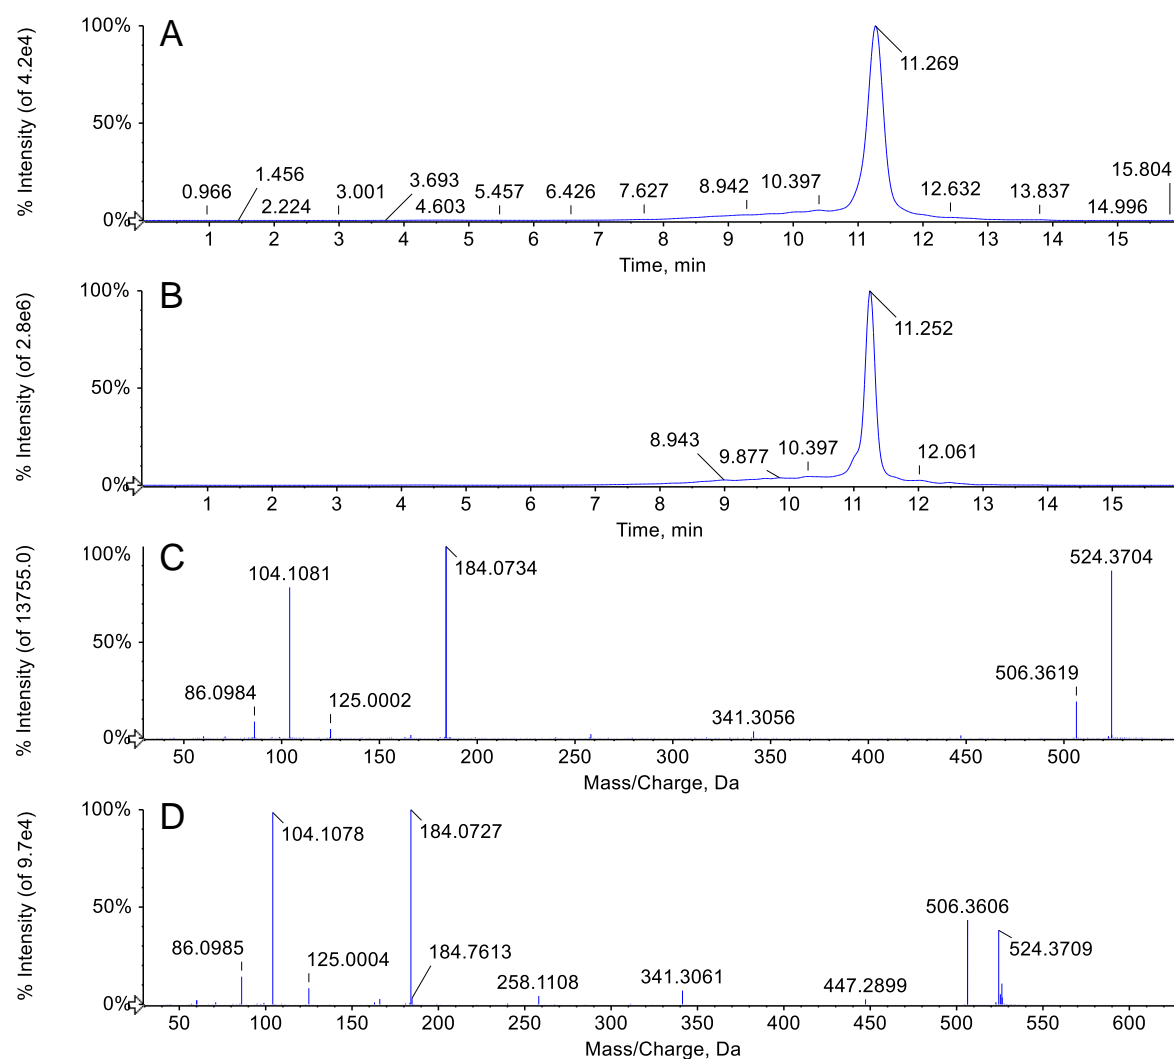

Fig S3: The EIC and MS/MS spectra for **LysoPC (18:0)** from the reference substance (A and C) and serum sample (B and D)

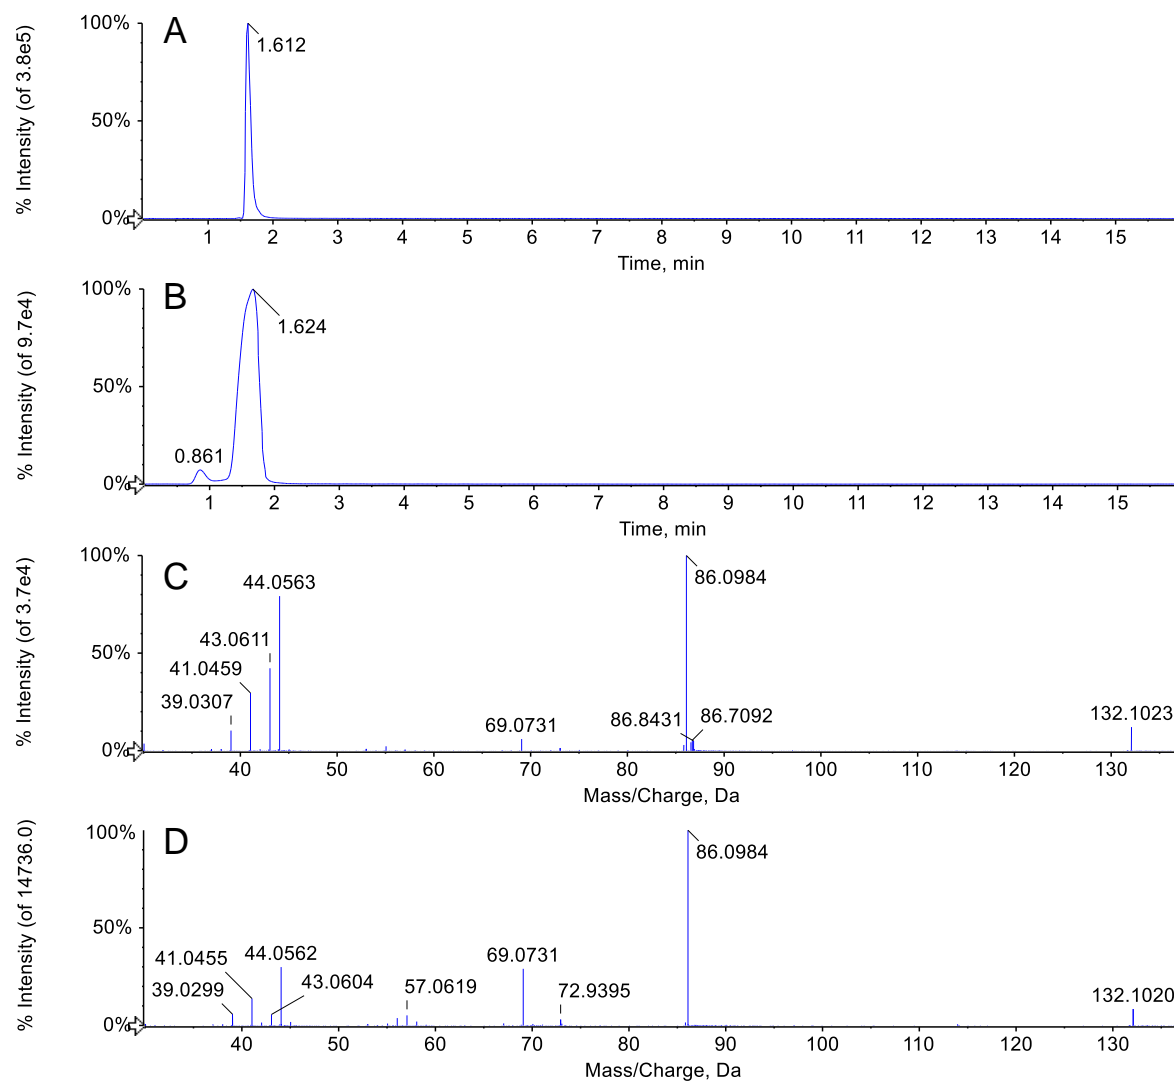

Fig S4: The EIC and MS/MS spectra for **leucine** from the reference substance (A and C) and serum sample (B and D)

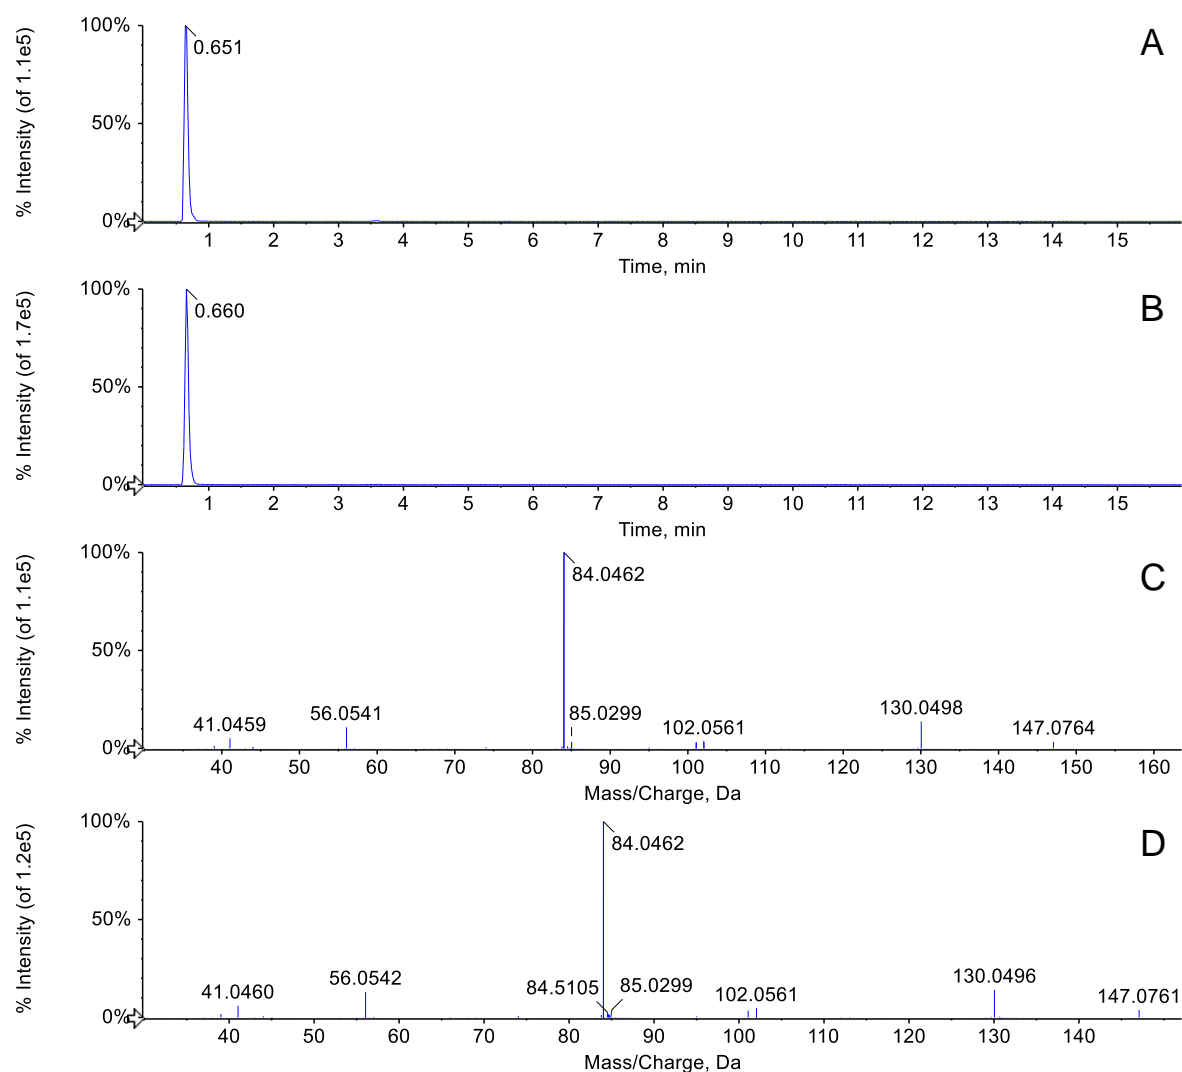

Fig S5: The EIC and MS/MS spectra for **glutamine** from the reference substance (A and C) and serum sample (B and D)

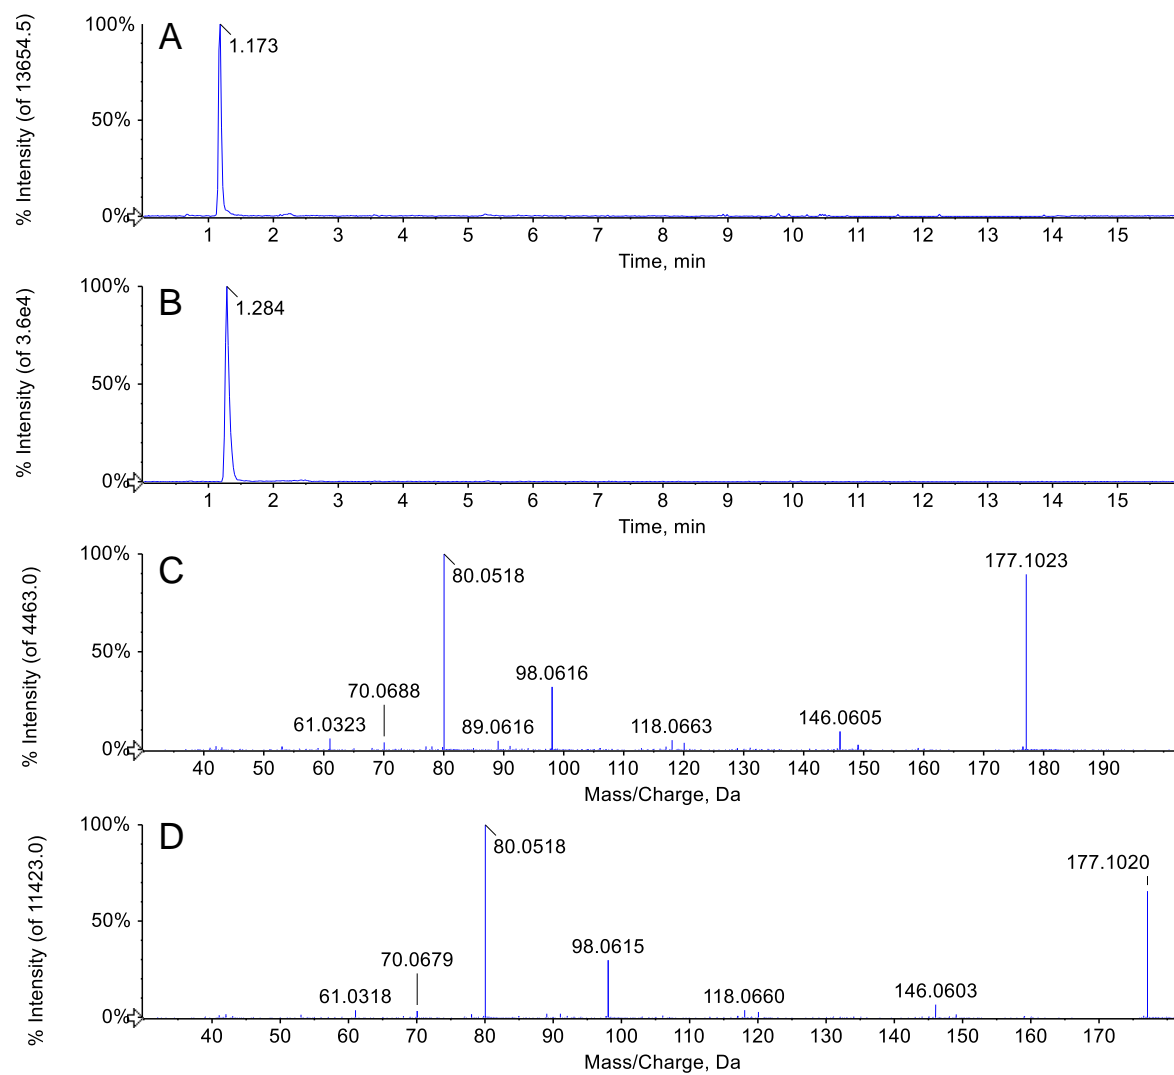

Fig S6: The EIC and MS/MS spectra for **5-hydroxytryptamine** from the reference substance (A and C) and serum sample (B and D)

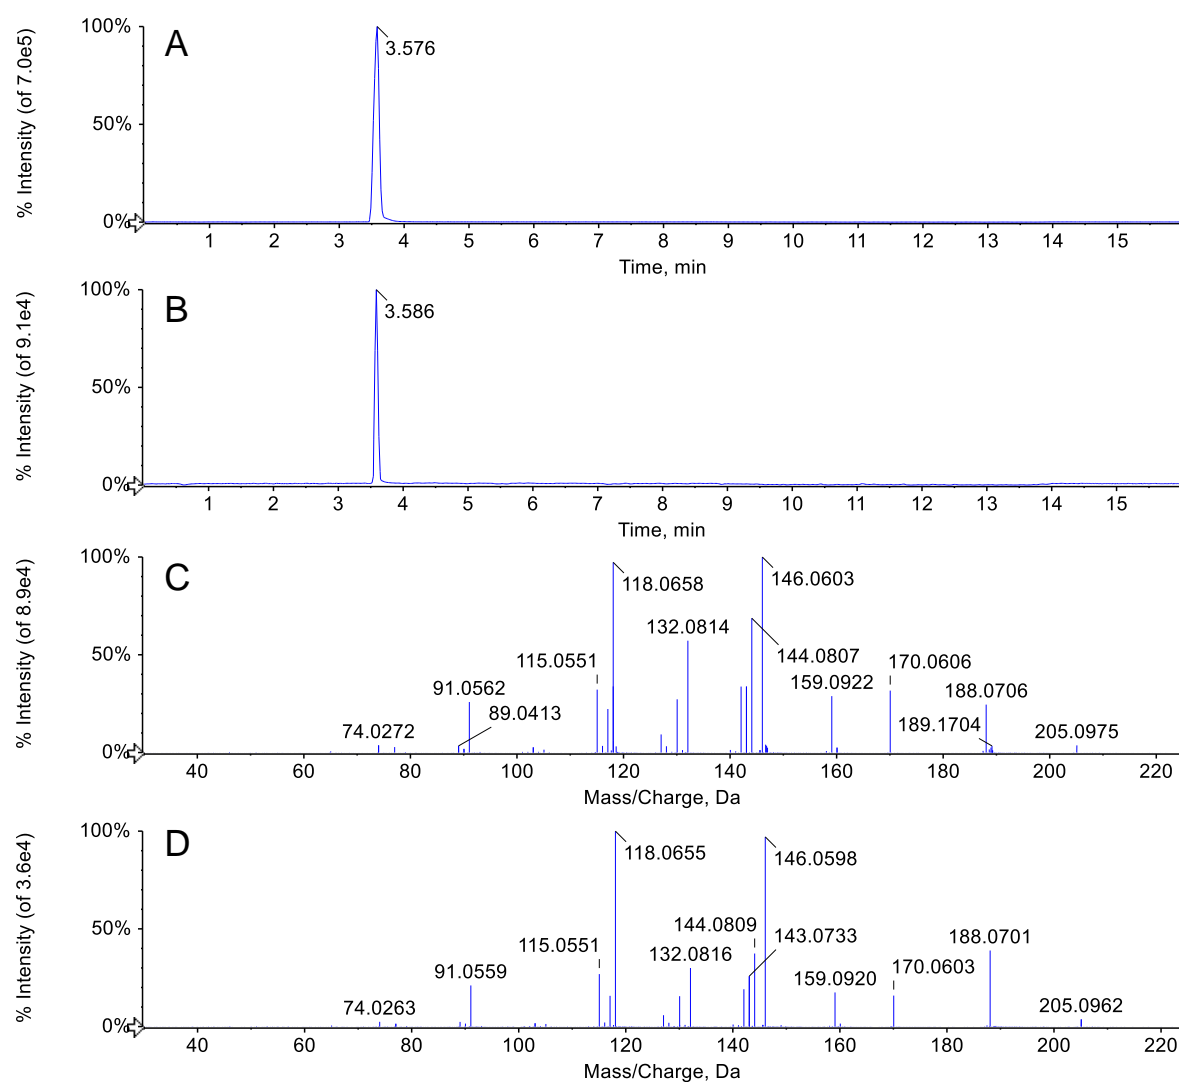

Fig S7: The EIC and MS/MS spectra for **tryptophan** from the reference substance (A and C) and serum sample (B and D)

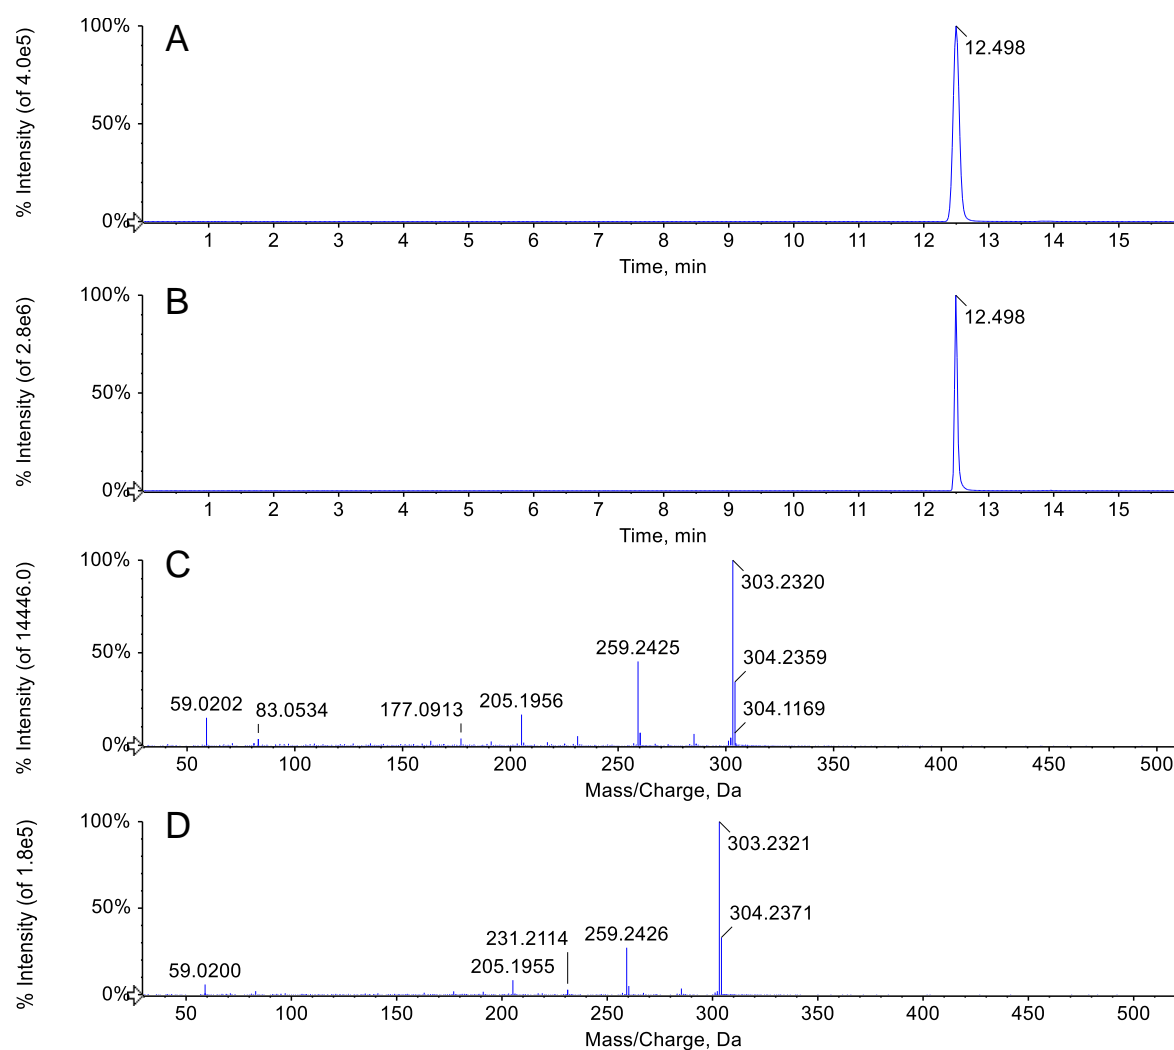

Fig S8: The EIC and MS/MS spectra for **arachidonic acid** from the reference substance (A and C) and serum sample (B and D)



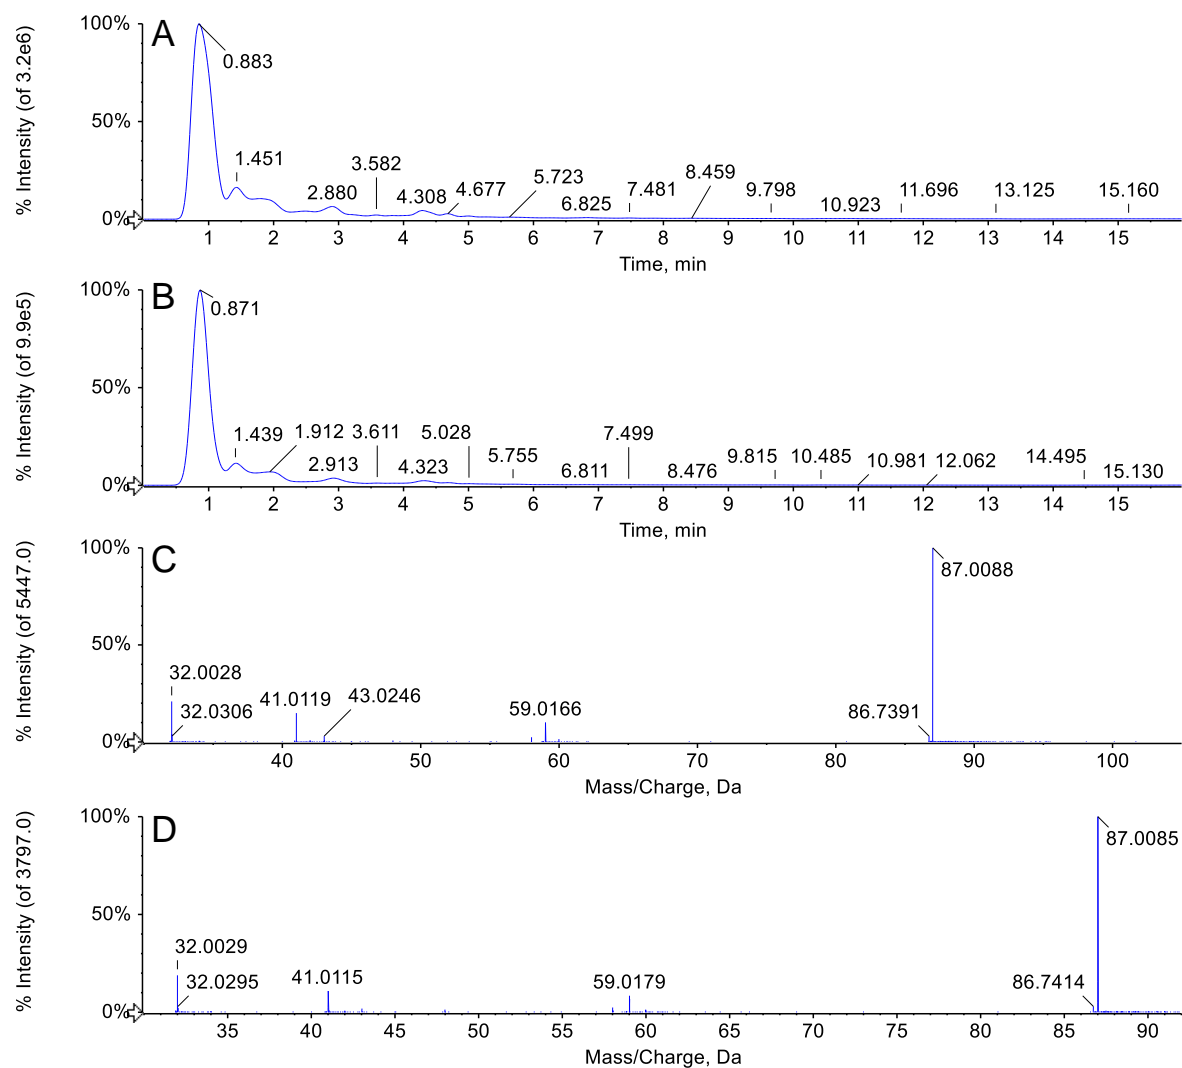

Fig S9: The EIC and MS/MS spectra for **pyruvic acid** from the reference substance (A and C) and serum sample (B and D)

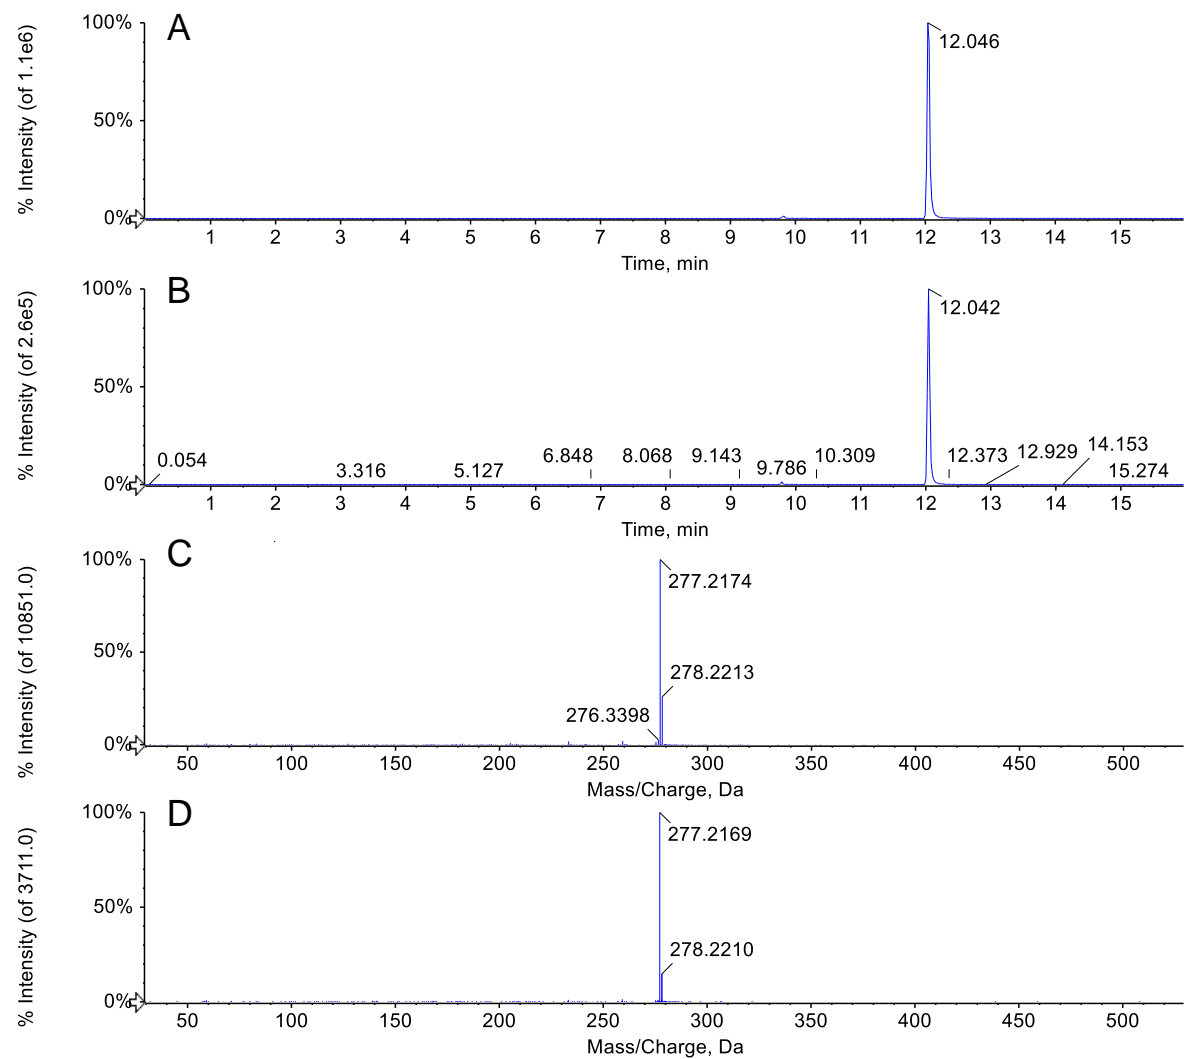

Fig S10: The EIC and MS/MS spectra for  $\alpha$ -linolenic acid from the reference substance (A and C) and serum sample (B and D)

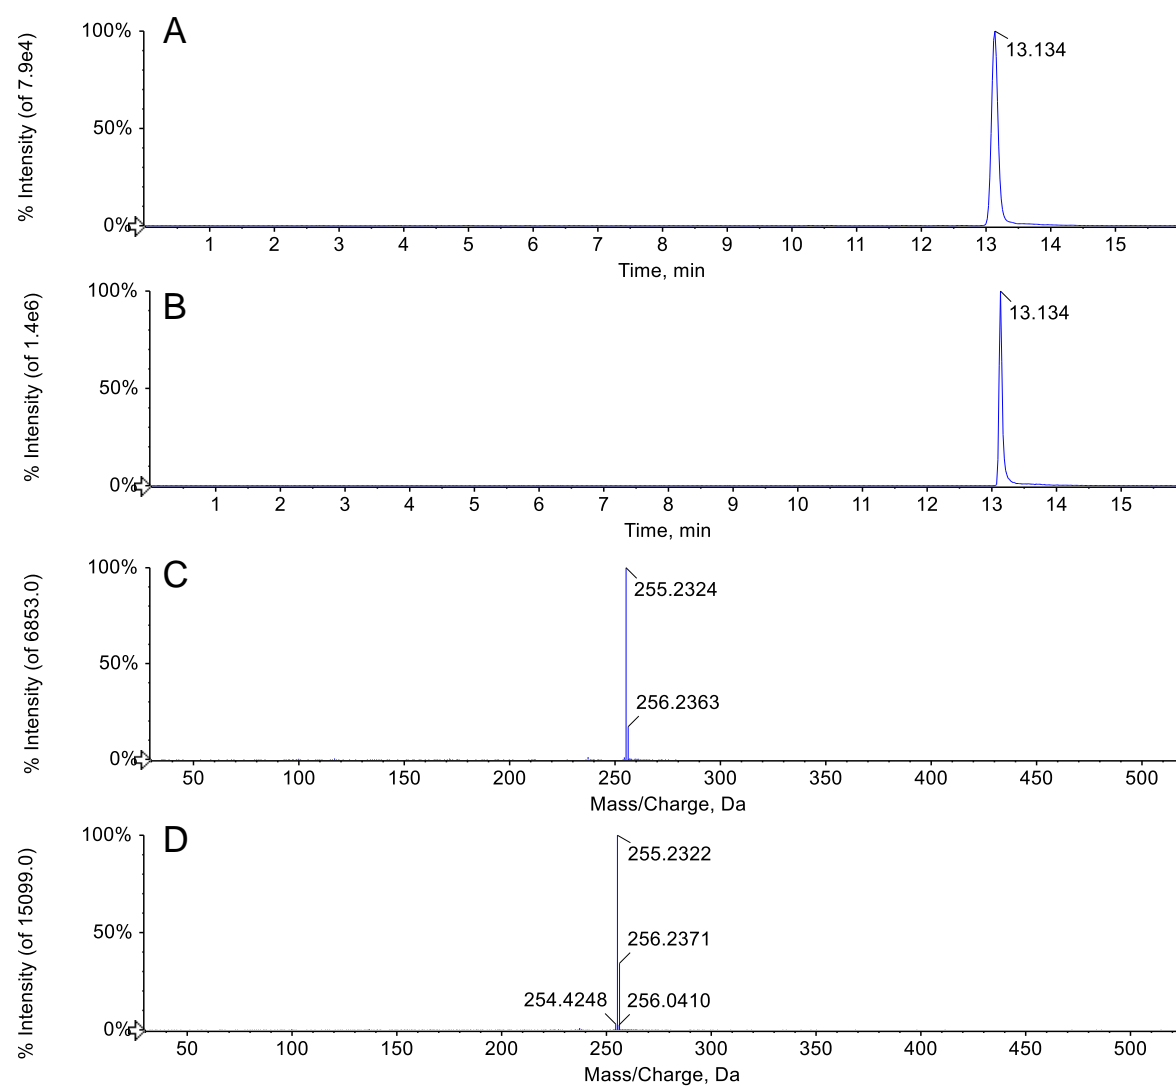

Fig S11: The EIC and MS/MS spectra for **palmitic acid** from the reference substance (A and C) and serum sample (B and D)

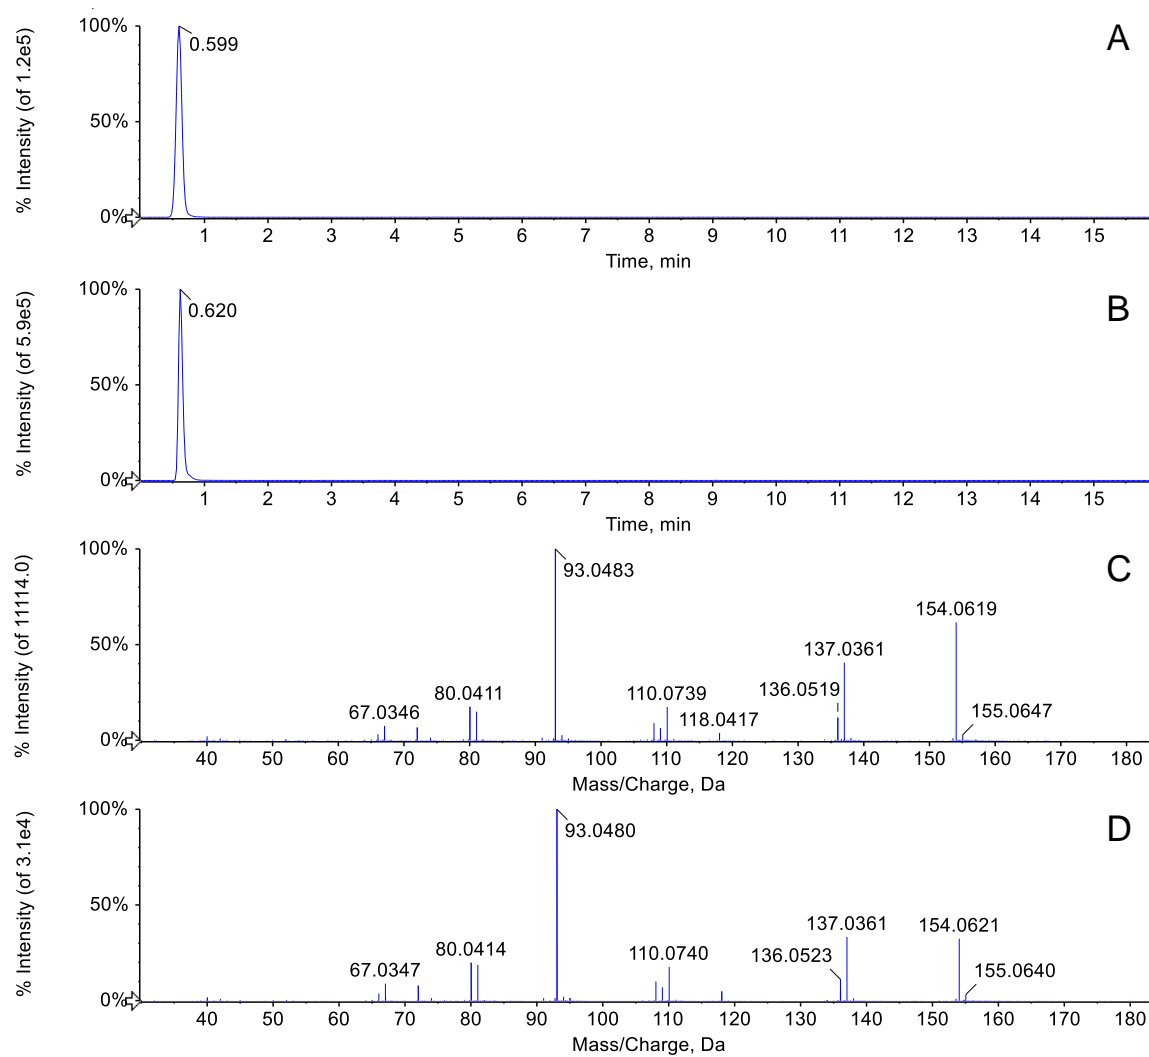

Fig S12: The EIC and MS/MS spectra for **histidine** from the reference substance (A and C) and serum sample (B and D)
